# Supplementary material for: Metataxonomic Analysis Demonstrates a Shift in Duodenal Microbiota in Patients with Obstructive Jaundice
Source: MDPI journal article supplement (doi:10.3390/microorganisms11061611), 2023-06-18
Supplement: s1 [file s1]

## SUPPLEMENTARY TABLES

**Table S1.** Diversity indices of individual samples in the jaundice group.

|      | Observed | Chao1  | se,chao1 | ACE    | se,ACE | Shannon | Simpson | InvSimpson | Fisher |
|------|----------|--------|----------|--------|--------|---------|---------|------------|--------|
| S020 | 75,00    | 75,00  | 0,00     | 75,00  | 2,81   | 2,13    | 0,75    | 4,02       | 8,84   |
| S021 | 51,00    | 51,00  | 0,00     | NA     | NA     | 3,04    | 0,91    | 11,44      | 5,72   |
| S022 | 35,00    | 35,00  | 0,00     | NA     | NA     | 2,63    | 0,88    | 8,40       | 3,75   |
| S023 | 113,00   | 116,00 | 4,18     | 113,94 | 5,13   | 2,74    | 0,89    | 8,73       | 14,10  |
| S024 | 62,00    | 62,00  | 0,00     | 62,00  | 0,99   | 2,57    | 0,80    | 4,96       | 7,13   |
| S025 | 77,00    | 77,00  | 0,50     | 77,55  | 1,46   | 3,05    | 0,92    | 12,88      | 9,11   |
| S026 | 61,00    | 61,00  | 0,00     | 61,00  | 1,69   | 2,96    | 0,90    | 10,49      | 7,00   |
| S027 | 87,00    | 87,00  | 0,50     | 87,16  | 2,65   | 3,34    | 0,94    | 16,60      | 10,46  |
| S028 | 87,00    | 87,00  | 0,00     | 87,00  | 2,84   | 2,48    | 0,75    | 4,02       | 10,46  |
| S029 | 60,00    | 60,00  | 0,25     | 60,23  | 3,25   | 1,47    | 0,52    | 2,10       | 6,87   |
| S030 | 73,00    | 74,00  | 2,33     | 74,00  | 2,34   | 2,49    | 0,82    | 5,57       | 8,57   |
| S031 | 49,00    | 49,00  | 0,00     | 49,00  | 0,99   | 2,92    | 0,91    | 10,57      | 5,47   |
| S032 | 65,00    | 65,00  | 0,00     | 65,00  | 0,99   | 2,66    | 0,82    | 5,65       | 7,52   |
| S033 | 77,00    | 77,00  | 0,00     | NA     | NA     | 3,37    | 0,94    | 16,87      | 9,11   |
| S034 | 62,00    | 62,00  | 0,00     | NA     | NA     | 2,73    | 0,83    | 5,75       | 7,13   |
| S035 | 86,00    | 86,00  | 0,00     | NA     | NA     | 3,52    | 0,95    | 19,03      | 10,33  |
| S036 | 79,00    | 79,00  | 0,00     | 79,00  | 2,16   | 2,23    | 0,80    | 4,91       | 9,38   |
| S037 | 61,00    | 61,00  | 0,00     | 61,00  | 0,99   | 3,13    | 0,92    | 13,12      | 7,00   |
| S038 | 78,00    | 78,00  | 0,00     | 78,00  | 1,40   | 2,32    | 0,74    | 3,82       | 9,24   |

**Table S2.** Mean distribution of phyla comparing control and jaundice cohorts.

| Phyla                    | Control | Jaundice |
|--------------------------|---------|----------|
| <i>Arthrobacter</i>      | 6,07    | 4,94     |
| <i>Fusobacterium</i>     | 1,19    | 4,03     |
| <i>Haemophilus</i>       | 4,00    | 2,39     |
| <i>Helicobacter</i>      | 6,23    | 2,36     |
| <i>Pelomonas</i>         | 8,29    | 6,43     |
| <i>Prevotella</i>        | 7,42    | 9,55     |
| <i>Propionibacterium</i> | 3,69    | 5,48     |
| <i>Pseudomonas</i>       | 11,02   | 14,59    |
| <i>Ralstonia</i>         | 3,31    | 2,13     |
| <i>Streptococcus</i>     | 6,53    | 5,20     |
| <i>Veillonella</i>       | 3,62    | 3,72     |
| Other                    | 38,64   | 39,19    |

**Table S3.** Mean distribution of genera comparing patients with cholelithiasis and HOP (head of pancreas) mass.

| Genera              | Cholelithiasis | HOP mass |
|---------------------|----------------|----------|
| <i>Arthrobacter</i> | 5,45           | 4,40     |
| <i>Bergeyella</i>   | 0              | 3,63     |
| <i>Haemophilus</i>  | 4,09           | 1,03     |
| <i>Helicobacter</i> | 4,42           | 0,03     |

|                          |       |       |
|--------------------------|-------|-------|
| <i>Microbacterium</i>    | 1,38  | 3,78  |
| <i>Pelomonas</i>         | 7,92  | 6,94  |
| <i>Prevotella</i>        | 5,46  | 4,45  |
| <i>Propionibacterium</i> | 3,43  | 7,24  |
| <i>Pseudomonas</i>       | 21,14 | 4,66  |
| <i>Ralstonia</i>         | 2,69  | 1,91  |
| <i>Staphylococcus</i>    | 0,78  | 3,21  |
| <i>Streptococcus</i>     | 7,81  | 10,80 |
| <i>Veillonella</i>       | 5,22  | 12,46 |
| <i>Other</i>             | 23,43 | 26,04 |

**Table S4.** Relative abundances, expressed as a percentage, of the bacterial phyla in the duodenum of patients when grouped according to the presence or absence of stone disease.

| Phyla             | Stone disease | Non-stone disease |
|-------------------|---------------|-------------------|
| Actinobacteria    | 14,90         | 18,44             |
| Bacillota         | 15,13         | 18,71             |
| Bacteriodota      | 12,11         | 13,54             |
| Chlamydiae        | 0             | 0                 |
| Cyanobacteria     | 0             | 0,02              |
| Deferribacteres   | 0             | 0,02              |
| Deinococcota      | 0,03          | 0,01              |
| Fibrobacteres     | 0             | 0                 |
| Fusobacteria      | 2,89          | 2,43              |
| Nitrospirae       | 0             | 0                 |
| Planctomycetes    | 0,02          | 0,01              |
| Pseudomonadota    | 54,62         | 46,54             |
| Spirochaetes      | 0,18          | 0,13              |
| Synergistetes     | 0,05          | 0                 |
| Tenericutes       | 0,07          | 0,13              |
| Verrucimicrobiota | 0             | 0,01              |

**Table S5.** Relative abundances, expressed as a percentage, of the bacterial phyla in the duodenum of patients, comparing patients with benign and malignant conditions for jaundiced as well as control patients.

| Phyla           | Control | Malignant | Benign |
|-----------------|---------|-----------|--------|
| Actinomycetota  | 16,79   | 20,21     | 13,83  |
| Bacillota       | 16,41   | 24,25     | 12,84  |
| Bacteriodota    | 11,00   | 14,07     | 14,76  |
| Chlamydiae      | 0       | 0,01      | 0      |
| Cyanobacteria   | 0,02    | 0         | 0      |
| Deferribacteres | 0,02    | 0         | 0      |
| Deinococcota    | 0,02    | 0,01      | 0,03   |
| Fibrobacteres   | 0,01    | 0         | 0      |

|                   |       |          |       |
|-------------------|-------|----------|-------|
| Fusobacteria      | 1,27  | 3,44     | 4,49  |
| Nitrospirae       | 0     | 0        | 0     |
| Planctomycetes    | 0     | 0,01     | 0,03  |
| Proteobacteria    | 54,34 | 37,56    | 53,59 |
| Spirochaetes      | 0,08  | 0,18     | 0,25  |
| Synergistetes     | 0     | 0,003764 | 0,08  |
| Tenericutes       | 0,03  | 0,260849 | 0,10  |
| Verrucimicrobiota | 0,01  | 0        | 0     |

**Table S6.** Bray-Curtis measure of dissimilarity of the beta-diversity of the microbiota of the duodenal mucosa factoring in multiple variables.

| Groups                                                   | df | R <sup>2</sup> | F-value | p-value  |
|----------------------------------------------------------|----|----------------|---------|----------|
| Control vs Jaundice                                      | 1  | 0,0225         | 0,8276  | 0,6224   |
| Gender                                                   | 1  | 0,02386        | 0,8801  | 0,5415   |
| CLO test                                                 | 1  | 0,02133        | 0,7845  | 0,6903   |
| Underlying disease                                       | 8  | 0,22942        | 1,0793  | 0,3187   |
| Benign vs Malignant                                      | 2  | 0,03852        | 0,7011  | 0,9091   |
| Stone disease vs Non-Stone disease                       | 1  | 0,03591        | 1,3408  | 0,1688   |
| Control vs Jaundice x Gender                             | 1  | 0,02528        | 0,9255  | 0,5405   |
| Control vs Jaundice x CLO test                           | 1  | 0,01973        | 0,7217  | 0,7323   |
| Control vs Jaundice x Underlying disease                 | #  | #              | #       | #        |
| Control vs Jaundice x Benign vs Malignant                | #  | #              | #       | #        |
| Control vs Jaundice x Stone disease vs Non-stone disease | 1  | 0,01949        | 0,7163  | 0,7572   |
| Underlying disease x Gender                              | 3  | 0,0619         | 0,7774  | 0,81219  |
| Underlying disease x CLO test                            | 3  | 0,0744         | 0,9146  | 0,5624   |
| Underlying disease x Benign vs Malignant                 | #  | #              | #       | #        |
| Underlying disease x Stone disease vs Non-stone disease  | #  | #              | #       | #        |
| Benign vs Malignant x Gender                             | 2  | 0,0464         | 0,8326  | 0,6883   |
| Benign vs Malignant x CLO test                           | 2  | 0,0565         | 1,0234  | 0,4186   |
| Benign vs Malignant x Stone disease vs Non-stone disease | #  | #              | #       | #        |
| Stone disease vs Non-stone disease x Gender              | 1  | 0,01661        | 0,6126  | 0,8911   |
| Stone disease vs Non-stone disease x CLO test            | 1  | 0,04852        | 1,8391  | 0,04895* |
| Gender x CLO test                                        | 1  | 0,01921        | 0,7028  | 0,7592   |
| Age                                                      | 1  | 0,01897        | 0,6963  | 0,7732   |
| Control vs Jaundice x Age                                | 1  | 0,02479        | 0,9055  | 0,5155   |
| Gender x Age                                             | 1  | 0,0227         | 0,8258  | 0,6234   |
| CLO test x Age                                           | 1  | 0,02425        | 0,8828  | 0,5445   |
| Underlying disease x Age                                 | 3  | 0,05787        | 0,6893  | 0,8991   |

|                                          |   |         |        |        |
|------------------------------------------|---|---------|--------|--------|
| Benign vs Malignant x Age                | 2 | 0,0538  | 0,9686 | 0,4835 |
| Stone disease vs Non-Stone disease x Age | 1 | 0,02445 | 0,9007 | 0,5524 |

# - represents no valid result. \* - significant difference (p-value < 0.05)

**Table S7.** Relative abundances, expressed as a percentage, of the bacterial phyla in the duodenum of patients, comparing patients based on the underlying conditions at the time of endoscopy.

| Phyla             | Choledocholithiasis | Cholelithiasis | Distal cholangiocarcinoma | Epigastric pain | Gastric cancer | GOR D work up | HOP mass | Peri ampullary tumor | PSC   |
|-------------------|---------------------|----------------|---------------------------|-----------------|----------------|---------------|----------|----------------------|-------|
| Actinomycetota    | 14,80               | 16,32          | 5,56                      | 17,27           | 15,20          | 16,60         | 21,52    | 34,61                | 3,14  |
| Bacillota         | 11,89               | 18,18          | 10,78                     | 15,03           | 12,01          | 12,99         | 34,19    | 10,23                | 23,36 |
| Bacteroidota      | 9,85                | 8,59           | 37,54                     | 13,17           | 7,08           | 13,24         | 12,11    | 5,39                 | 68,71 |
| Chlamydiae        | 0                   | 0              | 0,05                      | 0               | 0              | 0             | 0        | 0                    | 0     |
| Cyanobacteria     | 0                   | 0              | 0                         | 0,03            | 0              | 0             | 0        | 0                    | 0     |
| Deferribacteres   | 0                   | 0              | 0                         | 0,04            | 0              | 0             | 0        | 0                    | 0     |
| Deinococcota      | 0,03                | 0,03           | 0                         | 0,01            | 0              | 0             | 0,02     | 0,013                | 0     |
| Fibrobacteres     | 0                   | 0              | 0                         | 0,01            | 0              | 0             | 0        | 0                    | 0     |
| Fusobacteria      | 4,80                | 0,76           | 17,28                     | 1,13            | 0,223          | 7,12          | 1,52     | 0,49                 | 1,02  |
| Nitrospirae       | 0                   | 0,01           | 0                         | 0               | 0              | 0             | 0,01     | 0                    | 0     |
| Planctomycetes    | 0,03                | 0              | 0                         | 0               | 0,10           | 0             | 0        | 0                    | 0     |
| Pseudomonadota    | 58,28               | 56,01          | 28,80                     | 53,20           | 64,82          | 49,59         | 29,99    | 49,26                | 1,93  |
| Spirochaetes      | 0,11                | 0,08           | 0                         | 0,05            | 0,56           | 0,45          | 0,17     | 0                    | 1,84  |
| Synergistetes     | 0,09                | 0              | 0                         | 0               | 0              | 0             | 0,01     | 0                    | 0     |
| Tenericutes       | 0,11                | 0,02           | 0                         | 0,05            | 0              | 0             | 0,46     | 0                    | 0     |
| Verrucimicrobiota | 0                   | 0,01           | 0                         | 0,01            | 0              | 0             | 0        | 0                    | 0     |

**Table S8.** Impact of the multiple variables on the bacterial alpha diversity indices computed using Tukey HSD test.

| Groups                                           | Observed | Shannon |
|--------------------------------------------------|----------|---------|
| Cholelithiasis vs Choledocholithiasis            | 0,998    | 1,000   |
| Distal Cholangiocarcinoma vs Choledocholithiasis | 1,000    | 1,000   |
| Epigastric pain vs Choledocholithiasis           | 1,000    | 0,998   |
| Gastric Cancer vs Choledocholithiasis            | 1,000    | 1,000   |
| GORD work up vs Choledocholithiasis              | 0,999    | 0,990   |
| HOP mass vs Choledocholithiasis                  | 1,000    | 1,000   |
| Peri ampullary tumor vs Choledocholithiasis      | 0,999    | 1,000   |
| PSC vs Choledocholithiasis                       | 0,999    | 0,256   |
| Distal Cholangiocarcinoma vs Cholelithiasis      | 1,000    | 1,000   |
| Epigastric pain vs Cholelithiasis                | 1,000    | 0,989   |
| Gastric Cancer vs Cholelithiasis                 | 1,000    | 1,000   |
| GORD work up vs Cholelithiasis                   | 0,990    | 0,980   |
| HOP mass vs Cholelithiasis                       | 1,000    | 0,998   |
| Peri ampullary tumor vs Cholelithiasis           | 1,000    | 1,000   |

|                                                  |       |       |
|--------------------------------------------------|-------|-------|
| PSC vs Cholelithiasis                            | 1,000 | 0,317 |
| Epigastric pain vs Distal Cholangiocarcinoma     | 1,000 | 0,994 |
| Gastric Cancer vs Distal Cholangiocarcinoma      | 1,000 | 1,000 |
| GORD work up vs Distal Cholangiocarcinoma        | 1,000 | 0,973 |
| HOP mass vs Distal Cholangiocarcinoma            | 1,000 | 0,996 |
| Peri ampulary tumor vs Distal Cholangiocarcinoma | 1,000 | 0,999 |
| PSC vs Distal Cholangiocarcinoma                 | 1,000 | 0,858 |
| Gastric Cancer vs Epigastric pain                | 1,000 | 0,997 |
| GORD work up vs Epigastric pain                  | 0,997 | 0,999 |
| HOP mass vs Epigastric pain                      | 1,000 | 1,000 |
| Peri ampulary tumor vs Epigastric pain           | 1,000 | 1,000 |
| PSC vs Epigastric pain                           | 1,000 | 0,151 |
| GORD work up vs Gastric Cancer                   | 0,995 | 0,982 |
| HOP mass vs Gastric Cancer                       | 1,000 | 0,999 |
| Peri ampulary tumor vs Gastric Cancer            | 1,000 | 0,999 |
| PSC vs Gastric Cancer                            | 1,000 | 0,824 |
| HOP mass vs GORD work up                         | 0,999 | 1,000 |
| Peri ampulary tumor vs GORD work up              | 0,989 | 1,000 |
| PSC vs GORD work up                              | 0,991 | 0,248 |
| Peri ampulary tumor vs HOP mass                  | 1,000 | 1,000 |
| PSC vs HOP mass                                  | 1,000 | 0,210 |
| PSC vs Peri ampulary tumor                       | 1,000 | 0,456 |

**Table S9.** Impact of the multiple variables on the bacterial alpha diversity indices within the duodenal mucosa samples obtained by endoscopic biopsies, these differences were calculated using Dirichlet-Multinomial distribution test.

| Groups                                       | chi-square | p-value |
|----------------------------------------------|------------|---------|
| Epigastric pain vs Cholelithiasis            | 1,30       | 0,99    |
| Epigastric pain vs GORD work up              | $\infty$   | 0       |
| Epigastric pain vs Choledocholithiasis       | -18,65     | 1       |
| Epigastric pain vs Distal Cholangiocarcinoma | $\infty$   | 0       |
| Epigastric pain vs Gastric cancer            | $\infty$   | 0       |
| Epigastric pain vs HOP mass                  | 8,90       | 0,35    |
| Epigastric pain vs Peri ampulary tumor       | $\infty$   | 0       |
| Epigastric pain vs PSC                       | $\infty$   | 0       |
| Cholelithiasis vs GORD workup                | $\infty$   | 0       |
| Cholelithiasis vs Choledocholithiasis        | 3,84       | 0,87    |
| Cholelithiasis vs Distal Cholangiocarcinoma  | $\infty$   | 0       |
| Cholelithiasis vs Gastric cancer             | $\infty$   | 0       |
| Cholelithiasis vs HOP mass                   | 20,31      | 0,01    |
| Cholelithiasis vs Peri ampulary tumor        | $\infty$   | 0       |
| Cholelithiasis vs PSC                        | $\infty$   | 0       |
| GORD workup vs Choledocholithiasis           | $\infty$   | 0       |
| GORD work up vs Distal Cholangiocarcinoma    | $\infty$   | 0       |
| GORD workup vs Gastric cancer                | $\infty$   | 0       |
| GORD workup vs HOP mass                      | $\infty$   | 0       |

|                                                  |          |      |
|--------------------------------------------------|----------|------|
| GORD workup vs Peri ampulary tumor               | $\infty$ | 0    |
| GORD work up vs PSC                              | $\infty$ | 0    |
| Choledocholithiasis vs Distal Cholangiocarcinoma | $\infty$ | 0    |
| Choledocholithiasis vs Gastric cancer            | $\infty$ | 0    |
| Choledocholithiasis vs HOP mass                  | 1,16     | 0,1  |
| Choledocholithiasis vs Peri ampulary tumor       | $\infty$ | 0    |
| Choledocholithiasis vs PSC                       | $\infty$ | 0    |
| Distal Cholangiocarcinoma vs Gastric cancer      | $\infty$ | 0    |
| Distal Cholangiocarcinoma vs HOP mass            | $\infty$ | 0    |
| Distal Cholangiocarcinoma vs Peri ampulary tumor | $\infty$ | 0    |
| Distal Cholangiocarcinoma vs PSC                 | $\infty$ | 0    |
| Gastric cancer vs HOP mass                       | $\infty$ | 0    |
| Gastric cancer vs Peri ampulary tumor            | $\infty$ | 0    |
| Gastric cancer vs PSC                            | $\infty$ | 0    |
| HOP mass vs Peri ampulary tumor                  | $\infty$ | 0    |
| HOP mass vs PSC                                  | $\infty$ | 0    |
| Peri ampulary tumor vs PSC                       | $\infty$ | 0    |
| Stone disease vs non-stone disease               | -7,19    | 1    |
| Control vs Jaundice                              | 10,65    | 0,22 |
| Benign vs None                                   | 4,082    | 0,85 |
| Malignant vs None                                | 7,47     | 0,49 |
| CLO test Positive vs Negative                    | -15,58   | 1    |
| Gender Male vs Female                            | -2,59    | 1    |

---

“ $\infty$ ” represents no valid result
